# Supplementary material for: A High Diversity of Eurasian Lineage Low Pathogenicity Avian Influenza A Viruses Circulate among Wild Birds Sampled in Egypt
Source: PubMed Central journal article supplement (PMC3710070; doi:10.1371/journal.pone.0068522), 2013-07-12

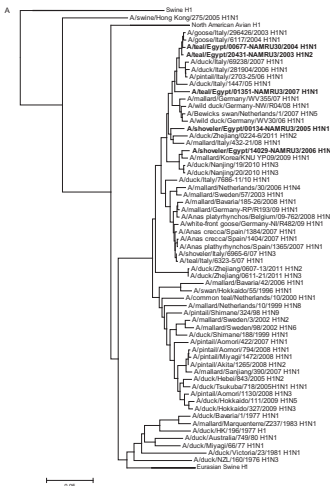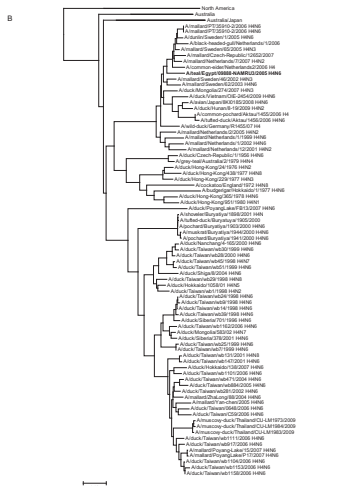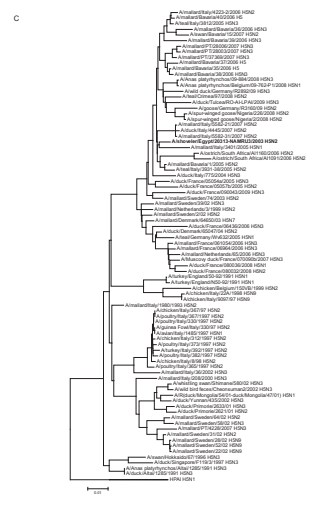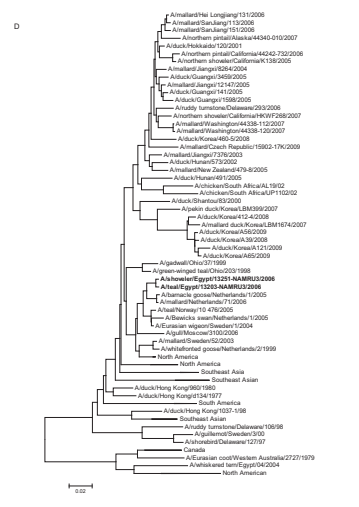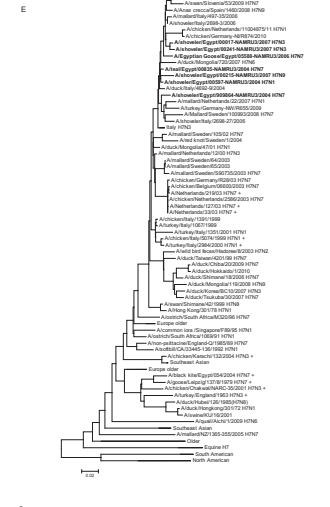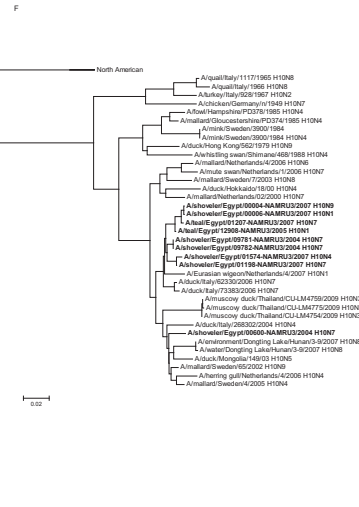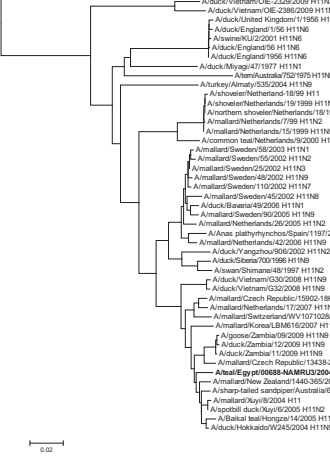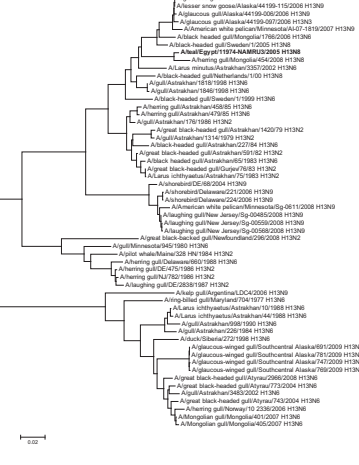

Supplement: pone.0068522.s001.pdf [file pone.0068522.s001.pdf]
