# Supplementary material for: A High Diversity of Eurasian Lineage Low Pathogenicity Avian Influenza A Viruses Circulate among Wild Birds Sampled in Egypt
Source: PubMed Central journal article supplement (PMC3710070; doi:10.1371/journal.pone.0068522), 2013-07-12
Supplement: pone.0068522.s003.pdf [file pone.0068522.s003.pdf]

| Group | 1                                        | 2                                     | 3                                     |
|-------|------------------------------------------|---------------------------------------|---------------------------------------|
| Gene  |                                          |                                       |                                       |
| PB2   | Egypt (2 viruses)                        | A/ml/Sweden/3/2002 (H1N2)             | A/Eggs/SouthAfrica/AI1448/2007 (H1N8) |
| PB1   | A/Mongolian gl/Mongolia/401/2007 (H13N6) | A/ml/Sweden/48/2002 (H11N9)           | A/sho/Egypt/14879-NAMRU3/2006 (H7N9)  |
| PA    | A/tl/Egypt/11974-NAMRU3/2005 (H13N8)     | A/av/Egypt/920431/2006 (H9N2)         | A/barheadgs/Mongolia/143/2005 (H12N3) |
| NP    | A/Mongolian gl/Mongolia/401/2007 (H13N6) | A/aqbird/Korea/w347/2008 (H5N2)       | A/ost/Italy/1038/2000 (H7N1)          |
| M     | A/Mongolian gl/Mongolia/401/2007 (H13N6) | A/ml/PT/28006/2007 (H5N3)             | A/ml/Netherlands/5/1999 (H2N9)        |
| NS    | A/Mongolian gl/Mongolia/401/2007 (H13N6) | A/ml/Netherlands/5/1999 (H2N9)        | A/tl/Egypt/09888-NAMRU3/2005 (H4N6)   |
| Group | 4                                        | 5                                     | 6                                     |
| Gene  |                                          |                                       |                                       |
| PB2   | A/sho/Egypt/09781-NAMRU3/2004 (H10N7)    | A/ml/Sweden/48/2002 (H11N9)           | A/aqbird/India/NIV-17095/2007 (H11N1) |
| PB1   | A/ml/PT/28006/2007 (H5N3)                | A/tl/Egypt/13203-NAMRU3/2006 (H6N2)   | A/qu/Lebanon/272/2010 (H9N2)          |
| PA    | A/pel/Zambia/01/2006 (H3N6)              | A/ml/CzechRep/13579-84K/2010 (H4N6)   | A/gb/Tyva/2/2010 (H5N1)               |
| NP    | A/ml/PT/28006/2007 (H5N3)                | A/wh-fr-gs/Netherlands/2/1999 (H6N2)  | Egypt                                 |
| M     | A/gs/Zambia/07/2008 (H4N6)               | A/ml/Sweden/3/2002 (H1N2)             | A/gar/Altai/1213/2007 (H5N2)          |
| NS    | A/dk/Altai/1285/1991 (H5N3)              | A/tl/Egypt/01351-NAMRU3/2007 (H1N1)   |                                       |
| Group | 7                                        | 8                                     | 9                                     |
| Gene  |                                          |                                       |                                       |
| PB2   | Egypt (2 viruses)                        | A/wibird/Korea/L60-2/2008 (H5N2)      | A/ml/Netherlands/5/1999 (H2N9)        |
| PB1   | A/Eggs/SouthAfrica/AI1448/2007 (H1N8)    | A/barheadgs/Mongolia/143/2005 (H12N3) | A/widk/Korea/SH60/2004 (H1N1)         |
| PA    | A/gar/Altai/1216/2007 (H3N6)             | A/gs/GD/1/1996 (H5N1)                 |                                       |
| NP    | A/gar/Altai/1216/2007 (H3N6)             | A/barheadgs/Mongolia/143/2005 (H12N3) | A/ml/CzechRep/13577-24K/2010 (H3N8)   |
| M     | A/wh-fr-gs/Netherlands/2/1999 (H6N2)     |                                       |                                       |
| Group | 10                                       | 11                                    | 12                                    |
| Gene  |                                          |                                       |                                       |
| PB2   | A/Mongolian gl/Mongolia/401/2007 (H13N6) | A/pel/Zambia/01/2006 (H3N6)           |                                       |
| NP    | A/sho/Egypt/14029-NAMRU3/2006 (H1N1)     | Egypt (2 viruses)                     | A/ml/Sweden/48/2002 (H11N9)           |
| Group | 13                                       | 14                                    |                                       |
| Gene  |                                          |                                       |                                       |
| NP    | A/ml/Sweden/3/2002 (H1N2)                | A/av/Egypt/920431/2006 (H9N2)         |                                       |

- East Asian Australian flyway
- Black Sea-Mediterranean flyway
- Central Asia flyway
- East Africa-West Asia flyway
- Nile Delta
